# Supplementary material for: An Easy Method of Synthesis CoxOy@C Composite with Enhanced Microwave Absorption Performance
Source: MDPI journal article supplement (doi:10.3390/nano10050902), 2020-05-08
Supplement: s1 [file s1]

***An easy method of synthesis  $\text{Co}_x\text{O}_y@\text{C}$  composite with  
enhanced microwave absorption performance***

Wenli Bao <sup>a, 1, \*</sup> Cong Chen <sup>a,b, 1</sup>, Zhenjun Si<sup>a,\*</sup>

<sup>a</sup> *School of Materials Science and Engineering, Changchun University of  
Science and Technology, No. 7989, Weixing Road, Changchun, 130022, PR  
China*

<sup>b</sup>*School of Physics and Electronic Information Engineering, Qinghai  
Nationalities University, Xining 810007, PR China*

<sup>1</sup> The first two authors contributed equally to this paper.

---

\*Corresponding authors. *E-mail addresses:* zdbwl@163.com (W. Bao)

---

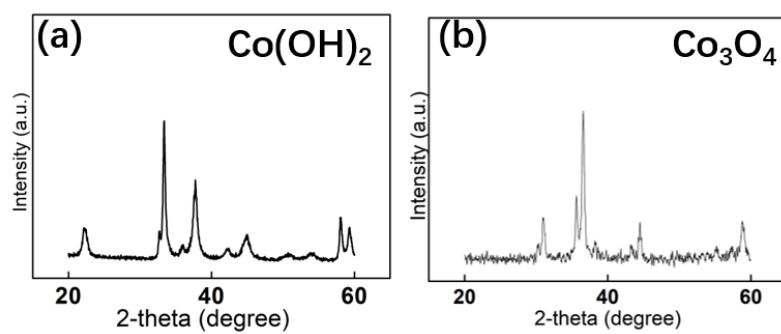

Figure S1 XRD patterns of  $\text{Co(OH)}_2$  and  $\text{Co}_3\text{O}_4$

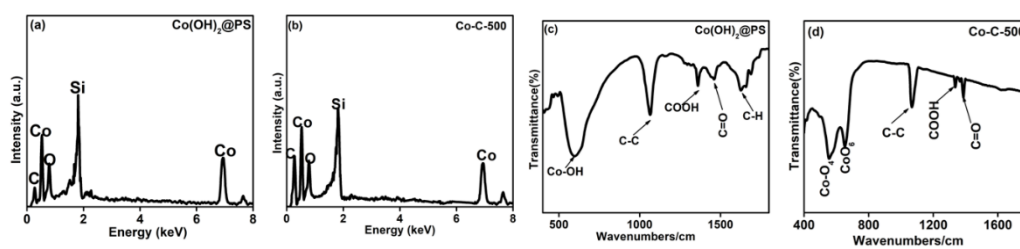

Figure S2: (a-b) EDS and (c-d) FR-IR spectral of  $\text{Co(OH)}_2\text{@PS}$  and C-Co-500
